# Supplementary material for: AntiBP3: A Method for Predicting Antibacterial Peptides against Gram-Positive/Negative/Variable Bacteria
Source: MDPI journal article supplement (doi:10.3390/antibiotics13020168), 2024-02-08
Supplement: s1 [file s1]

**Table S4: Performance of ML-models on training and validation dataset developed using four types of Binary profile-based features of N, C, NC-terminal of gram-positive ABPs**

| Feature type     | Terminal  | Training set |      |      |      |       |      | Validation set |      |      |             |       |      |
|------------------|-----------|--------------|------|------|------|-------|------|----------------|------|------|-------------|-------|------|
|                  |           | Sn           | Sp   | Acc  | AUC  | AUPRC | MCC  | Sn             | Sp   | Acc  | AUC         | AUPRC | MCC  |
| <b>AAB (RF)</b>  | <b>N</b>  | 81.3         | 80.9 | 81.1 | 0.90 | 0.91  | 0.62 | 78.0           | 88.2 | 83.1 | 0.92        | 0.92  | 0.67 |
|                  | <b>C</b>  | 79.2         | 79.6 | 79.4 | 0.87 | 0.89  | 0.59 | 75.3           | 79.6 | 77.4 | 0.86        | 0.86  | 0.55 |
|                  | <b>NC</b> | 84.1         | 84.1 | 84.1 | 0.92 | 0.92  | 0.68 | 80.7           | 90.3 | 85.5 | <b>0.93</b> | 0.92  | 0.71 |
| <b>DPB (SVC)</b> | <b>N</b>  | 79.8         | 79.2 | 79.5 | 0.88 | 0.89  | 0.59 | 77.4           | 85.5 | 81.5 | 0.89        | 0.90  | 0.63 |
|                  | <b>C</b>  | 77.0         | 76.9 | 77.0 | 0.85 | 0.88  | 0.54 | 68.8           | 83.3 | 76.1 | 0.85        | 0.85  | 0.53 |
|                  | <b>NC</b> | 82.3         | 81.9 | 82.1 | 0.90 | 0.91  | 0.64 | 79.0           | 88.2 | 83.6 | <b>0.91</b> | 0.90  | 0.68 |
| <b>AIB (ET)</b>  | <b>N</b>  | 79.8         | 79.0 | 79.4 | 0.89 | 0.90  | 0.59 | 78.0           | 86.6 | 82.3 | 0.91        | 0.91  | 0.65 |
|                  | <b>C</b>  | 78.2         | 78.1 | 78.2 | 0.88 | 0.89  | 0.56 | 79.0           | 77.4 | 78.2 | 0.88        | 0.87  | 0.57 |
|                  | <b>NC</b> | 82.8         | 82.1 | 82.5 | 0.91 | 0.91  | 0.65 | 80.1           | 88.2 | 84.1 | <b>0.93</b> | 0.91  | 0.69 |
| <b>PCB (RF)</b>  | <b>N</b>  | 82.5         | 81.2 | 81.9 | 0.90 | 0.91  | 0.64 | 77.4           | 85.5 | 81.5 | 0.92        | 0.92  | 0.63 |
|                  | <b>C</b>  | 79.8         | 80.9 | 80.4 | 0.88 | 0.89  | 0.61 | 75.8           | 80.7 | 78.2 | 0.86        | 0.85  | 0.57 |
|                  | <b>NC</b> | 82.9         | 81.5 | 82.2 | 0.91 | 0.91  | 0.64 | 82.3           | 87.6 | 85.0 | <b>0.93</b> | 0.92  | 0.70 |

# **Sn**: Sensitivity, **Sp**: Specificity, **Acc**: Accuracy, **MCC**: Matthews Correlation Coefficient, **AUC**: Area Under the Receiver Operating Characteristic curve, **AUPRC**: Area Under the Precision-Recall Curve, **AAB**: Amino acid-based binary profile, **DPB**: Dipeptide-based binary profile, **PCB**: Physico-chemical properties based binary profile, **AIB**: Amino-acid indices based binary profile, **RF**: Random Forest classifier, **ET**: Extra-tree classifier, **SVC**: Support vector classifier
