# Supplementary material for: AntiBP3: A Method for Predicting Antibacterial Peptides against Gram-Positive/Negative/Variable Bacteria
Source: MDPI journal article supplement (doi:10.3390/antibiotics13020168), 2024-02-08
Supplement: s1 [file s1]

**Table S12: Performance of hybrid model (MOTIF+ML) on the validation set of gram-negative ABPs independent set at different frequencies**

| Frequency of a motif | Correct hits (MOTIF+ML) | Sn          | Sp          | Acc         | AUC         | AUPRC       | MCC         |
|----------------------|-------------------------|-------------|-------------|-------------|-------------|-------------|-------------|
| fp10_motif           | 90.21%                  | 93.5        | 86.9        | 90.2        | 0.96        | 0.95        | 0.81        |
| fp20_motif           | 92.27%                  | 92.8        | 91.8        | 92.3        | 0.97        | 0.97        | 0.85        |
| fp30_motif           | 93.30%                  | 92.8        | 93.8        | 93.3        | 0.97        | 0.97        | 0.87        |
| <b>Only ML</b>       | <b>93.64%</b>           | <b>92.4</b> | <b>94.9</b> | <b>93.6</b> | <b>0.98</b> | <b>0.98</b> | <b>0.86</b> |

# **Sn**: Sensitivity, **Sp**: Specificity, **Acc**: Accuracy, **MCC**: Matthews Correlation Coefficient, **AUC**: Area Under the Receiver Operating Characteristic curve, **AUPRC**: Area Under the Precision-Recall Curve
