# Supplementary material for: AntiBP3: A Method for Predicting Antibacterial Peptides against Gram-Positive/Negative/Variable Bacteria
Source: MDPI journal article supplement (doi:10.3390/antibiotics13020168), 2024-02-08
Supplement: s1 [file s1]

**Table S14: Performance of DL-models on validation dataset developed using composition-based features for gram-positive ABPs**

| DL Model     | ANN         |       |      | CNN         |       |      | RNN         |       |      | LSTM        |       |       |
|--------------|-------------|-------|------|-------------|-------|------|-------------|-------|------|-------------|-------|-------|
| Feature Type | AUC         | AUPRC | MCC   |
| AAC          | 0.84        | 0.86  | 0.53 | 0.87        | 0.88  | 0.57 | 0.90        | 0.91  | 0.69 | 0.89        | 0.90  | 0.64  |
| DPC          | 0.87        | 0.88  | 0.62 | 0.88        | 0.88  | 0.60 | 0.88        | 0.89  | 0.64 | 0.90        | 0.88  | 0.62  |
| ATC          | 0.64        | 0.65  | 0.29 | 0.65        | 0.66  | 0.09 | 0.61        | 0.65  | 0.14 | 0.59        | 0.66  | 0.16  |
| BTC          | 0.67        | 0.60  | 0.04 | 0.66        | 0.60  | 0.04 | 0.68        | 0.60  | 0.17 | 0.37        | 0.42  | -0.06 |
| CTC          | 0.85        | 0.86  | 0.59 | 0.86        | 0.86  | 0.61 | 0.85        | 0.86  | 0.59 | 0.85        | 0.86  | 0.58  |
| PCP          | <b>0.90</b> | 0.91  | 0.66 | 0.85        | 0.88  | 0.54 | <b>0.92</b> | 0.92  | 0.69 | 0.79        | 0.78  | 0.44  |
| RRI          | 0.83        | 0.85  | 0.53 | 0.85        | 0.84  | 0.54 | 0.86        | 0.84  | 0.53 | 0.82        | 0.83  | 0.50  |
| PRI          | 0.71        | 0.74  | 0.33 | 0.82        | 0.83  | 0.46 | 0.82        | 0.80  | 0.48 | 0.73        | 0.75  | 0.36  |
| DDR          | 0.81        | 0.79  | 0.48 | 0.82        | 0.80  | 0.40 | 0.84        | 0.83  | 0.55 | 0.71        | 0.71  | 0.32  |
| SEP          | 0.72        | 0.72  | 0.41 | 0.72        | 0.72  | 0.25 | 0.72        | 0.72  | 0.23 | 0.72        | 0.72  | 0.22  |
| SER          | 0.87        | 0.88  | 0.58 | 0.88        | 0.88  | 0.58 | 0.90        | 0.90  | 0.72 | 0.85        | 0.86  | 0.50  |
| SPC          | 0.81        | 0.85  | 0.47 | 0.84        | 0.85  | 0.50 | 0.87        | 0.89  | 0.62 | 0.78        | 0.79  | 0.43  |
| PAAC         | 0.86        | 0.84  | 0.60 | 0.89        | 0.90  | 0.58 | 0.87        | 0.88  | 0.63 | 0.89        | 0.84  | 0.63  |
| APAAC        | 0.87        | 0.86  | 0.58 | 0.88        | 0.87  | 0.59 | 0.89        | 0.90  | 0.61 | 0.88        | 0.89  | 0.66  |
| QSO          | 0.87        | 0.87  | 0.62 | <b>0.91</b> | 0.92  | 0.67 | 0.88        | 0.89  | 0.58 | <b>0.90</b> | 0.90  | 0.66  |

# **AUC**: Area Under the Receiver Operating Characteristic curve, **AUPRC**:Area Under the Precision-Recall Curve, **MCC**: Matthews Correlation Coefficient, **AAC**: Amino acid

composition, **APAAC**: Amphiphilic pseudo amino acid composition, **DDR**: Distance distribution of residue, **DPC**: Di-peptide composition, **QSO**: Quasi-sequence order, **PCP**: Physico-chemical properties composition, **PAAC**: Pseudo amino acid composition, **RRI**: Residue repeat Information, **SPC**: Shannon entropy of physicochemical properties, **ATC**: Atomic composition , **BTC**: Bond type composition, **CTC**: Conjoint triad descriptors, **PRI**: Property repeats index, **SEP**: Shannon entropy of a protein, **SER**: Shannon entropy of a residue, **ANN**: Artificial neural network, **CNN**: Convolution neural network, **RNN**: Recurrent neural network, **LSTM**: Long short-term memory
