# Supplementary material for: AntiBP3: A Method for Predicting Antibacterial Peptides against Gram-Positive/Negative/Variable Bacteria
Source: MDPI journal article supplement (doi:10.3390/antibiotics13020168), 2024-02-08
Supplement: s1 [file s1]

**Figure S2: The AUC-ROC comparison of different ML models on binary-profile AAB features for NC-terminal for GP, GN and GV ABPs.**

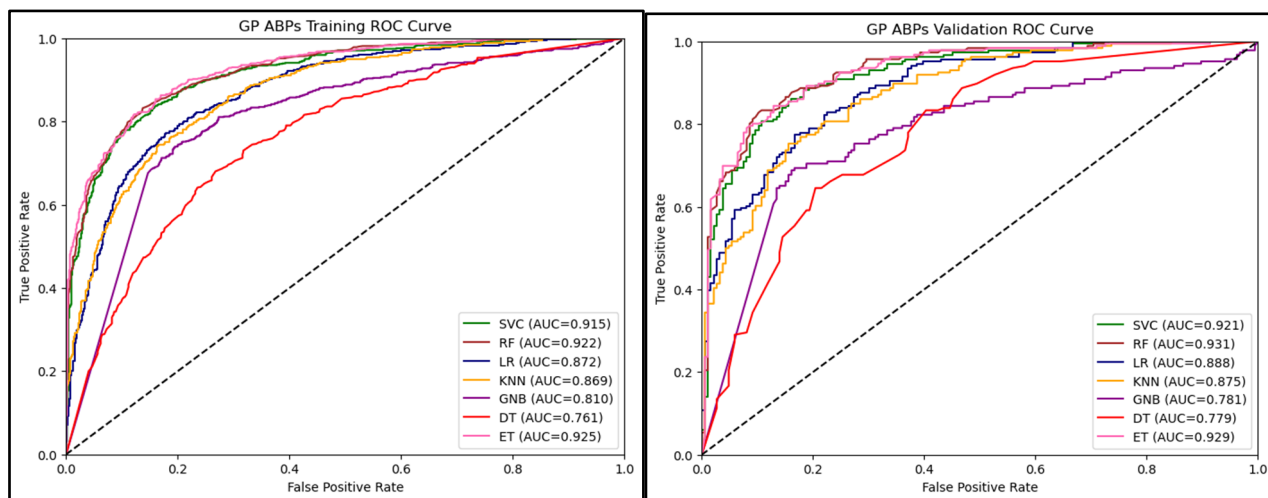

**Figure S2.1: The performance of ML models on training and testing data of GP ABPs on AAB (NC-terminal)**

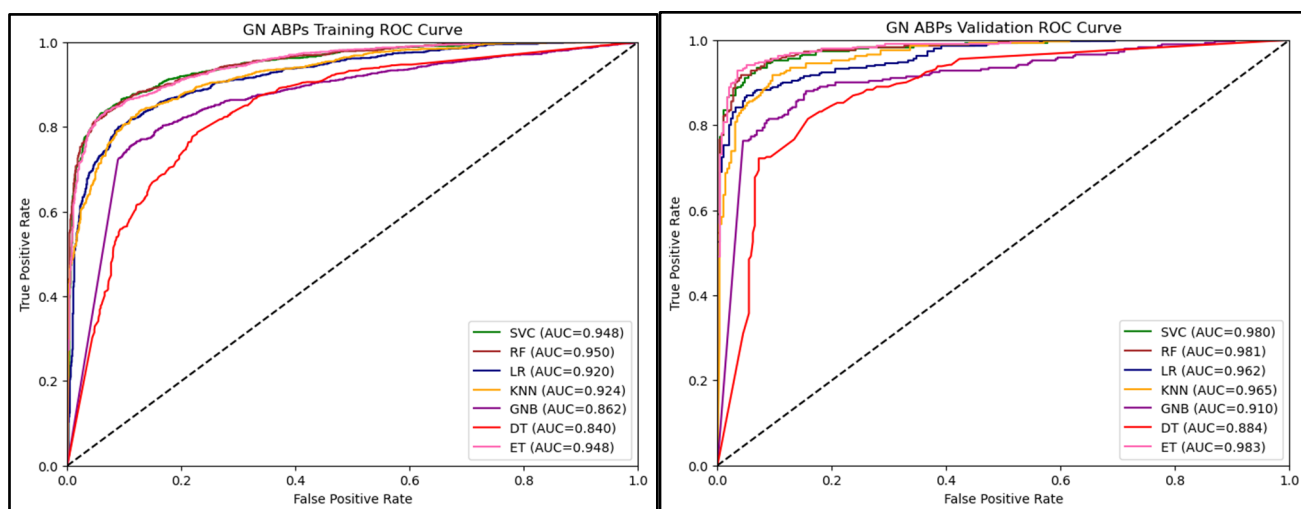

**Figure S2.2: Performance of ML models on training and testing data of GN ABPs on AAB (NC-terminal)**

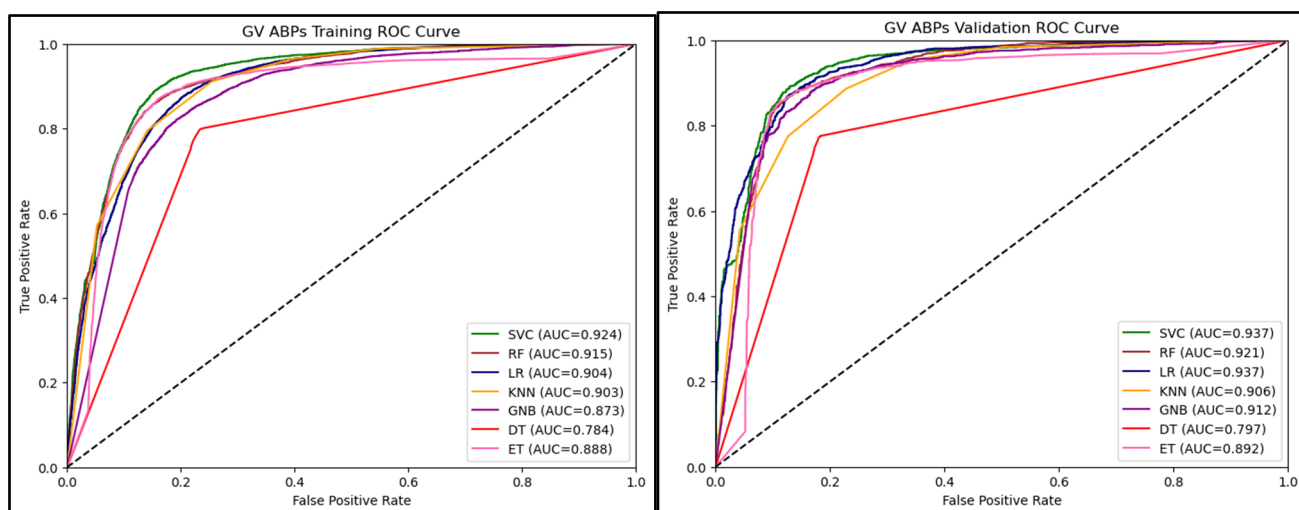

**Figure S2.3: Performance of ML models on training and testing data of GV ABPs on AAB (NC-terminal)**
