# Supplementary material for: AntiBP3: A Method for Predicting Antibacterial Peptides against Gram-Positive/Negative/Variable Bacteria
Source: MDPI journal article supplement (doi:10.3390/antibiotics13020168), 2024-02-08
Supplement: s1 [file s1]

**Table S5: Performance of ML-models on training and validation dataset developed using four types of Binary profile-based features of N, C, NC-terminal of gram-negative ABPs**

| Feature type     | Terminal  | Training set |      |      |      |       |      | Validation set |      |      |             |       |      |
|------------------|-----------|--------------|------|------|------|-------|------|----------------|------|------|-------------|-------|------|
|                  |           | Sn           | Sp   | Acc  | AUC  | AUPRC | MCC  | Sn             | Sp   | Acc  | AUC         | AUPRC | MCC  |
| <b>AAB (ET)</b>  | <b>N</b>  | 86.7         | 87.0 | 86.9 | 0.94 | 0.95  | 0.74 | 89.4           | 95.5 | 92.4 | 0.97        | 0.97  | 0.85 |
|                  | <b>C</b>  | 83.8         | 84.2 | 84.0 | 0.92 | 0.93  | 0.68 | 89.7           | 89.4 | 89.5 | 0.95        | 0.96  | 0.79 |
|                  | <b>NC</b> | 86.8         | 88.0 | 87.4 | 0.95 | 0.95  | 0.75 | 92.4           | 94.9 | 93.6 | <b>0.98</b> | 0.98  | 0.87 |
| <b>DPB (SVC)</b> | <b>N</b>  | 86.3         | 85.9 | 86.1 | 0.93 | 0.94  | 0.72 | 88.0           | 91.8 | 89.9 | 0.97        | 0.97  | 0.80 |
|                  | <b>C</b>  | 83.4         | 83.2 | 83.3 | 0.91 | 0.93  | 0.67 | 88.3           | 88.3 | 88.3 | 0.95        | 0.96  | 0.77 |
|                  | <b>NC</b> | 86.9         | 86.4 | 86.7 | 0.94 | 0.95  | 0.73 | 93.1           | 93.8 | 93.5 | <b>0.98</b> | 0.98  | 0.87 |
| <b>AIB (ET)</b>  | <b>N</b>  | 86.9         | 86.9 | 86.9 | 0.94 | 0.95  | 0.74 | 90.0           | 94.5 | 92.3 | 0.97        | 0.97  | 0.85 |
|                  | <b>C</b>  | 84.0         | 84.8 | 84.4 | 0.92 | 0.93  | 0.69 | 88.0           | 88.0 | 88.0 | 0.96        | 0.96  | 0.76 |
|                  | <b>NC</b> | 86.4         | 86.6 | 86.5 | 0.95 | 0.95  | 0.73 | 92.1           | 92.4 | 92.3 | <b>0.98</b> | 0.98  | 0.85 |
| <b>PCB (ET)</b>  | <b>N</b>  | 85.8         | 86.6 | 86.2 | 0.94 | 0.94  | 0.72 | 90.7           | 93.5 | 92.1 | 0.97        | 0.97  | 0.84 |
|                  | <b>C</b>  | 83.3         | 83.9 | 83.6 | 0.91 | 0.92  | 0.67 | 89.0           | 85.2 | 87.1 | 0.94        | 0.95  | 0.74 |
|                  | <b>NC</b> | 86.6         | 86.5 | 86.6 | 0.94 | 0.95  | 0.73 | 94.2           | 91.4 | 92.8 | <b>0.98</b> | 0.98  | 0.86 |

# **Sn**: Sensitivity, **Sp**: Specificity, **Acc**: Accuracy, **MCC**: Matthews Correlation Coefficient, **AUC**: Area Under the Receiver Operating Characteristic curve, **AUPRC**: Area Under the Precision-Recall Curve, **AAB**: Amino acid-based binary profile, **DPB**: Dipeptide-based binary profile, **PCB**: Physico-chemical properties based binary profile, **AIB**: Amino-acid indices based binary profile, **ET**: Extra-tree classifier, **SVC**: Support vector classifier
