# Supplementary material for: AntiBP3: A Method for Predicting Antibacterial Peptides against Gram-Positive/Negative/Variable Bacteria
Source: MDPI journal article supplement (doi:10.3390/antibiotics13020168), 2024-02-08
Supplement: s1 [file s1]

**Table S10: Performance of hybrid model (BLAST+ML) on the validation set of gram-variable ABPs independent at different e-value**

| <b>E-value</b>  | <b>Correct hits (BLAST+ML)</b> | <b>Sn</b> | <b>Sp</b> | <b>Acc</b> | <b>AUC</b> | <b>AUPRC</b> | <b>MCC</b> |
|-----------------|--------------------------------|-----------|-----------|------------|------------|--------------|------------|
| <b>1.00E-20</b> | 87.26%                         | 86.5      | 88.6      | 87.6       | 0.93       | 0.92         | 0.75       |
| <b>1.00E-10</b> | 87.37%                         | 87.2      | 88.3      | 87.7       | 0.92       | 0.87         | 0.75       |
| <b>1.00E-06</b> | 87.59%                         | 86.8      | 88.9      | 87.8       | 0.92       | 0.86         | 0.76       |
| <b>0.0001</b>   | 87.62%                         | 86.8      | 88.8      | 87.8       | 0.92       | 0.86         | 0.76       |
| <b>0.001</b>    | 87.62%                         | 86.6      | 88.8      | 87.7       | 0.92       | 0.87         | 0.75       |
| <b>0.01</b>     | 87.40%                         | 86.1      | 88.9      | 87.5       | 0.92       | 0.87         | 0.75       |
| <b>0.1</b>      | 87.34%                         | 85.9      | 88.8      | 87.3       | 0.92       | 0.88         | 0.75       |
| <b>1</b>        | 86.84%                         | 85.1      | 88.3      | 86.7       | 0.92       | 0.88         | 0.73       |
| <b>10</b>       | 83.81%                         | 81.4      | 85.0      | 83.2       | 0.91       | 0.88         | 0.66       |
| <b>50</b>       | 82.39%                         | 79.2      | 84.1      | 81.7       | 0.91       | 0.88         | 0.63       |
| <b>100</b>      | 82.03%                         | 78.9      | 83.8      | 81.3       | 0.91       | 0.88         | 0.63       |
| <b>200</b>      | 81.91%                         | 78.8      | 83.6      | 81.2       | 0.91       | 0.88         | 0.63       |
| <b>1000</b>     | 81.80%                         | 78.6      | 83.6      | 81.1       | 0.91       | 0.88         | 0.62       |
| <b>Only ML</b>  | 87.01%                         | 83.9      | 90.1      | 87.0       | 0.94       | 0.93         | 0.74       |

# **Sn**: Sensitivity, **Sp**: Specificity, **Acc**: Accuracy, **MCC**: Matthews Correlation Coefficient, **AUC**: Area Under the Receiver Operating Characteristic curve, **AUPRC**: Area Under the Precision-Recall Curve
