# Supplementary material for: AntiBP3: A Method for Predicting Antibacterial Peptides against Gram-Positive/Negative/Variable Bacteria
Source: MDPI journal article supplement (doi:10.3390/antibiotics13020168), 2024-02-08

**Figure S3: Confusion matrix of best ML-model (AAB-based binary feature for NC-terminal) on the validation set of GP, GN and GV ABPs independent**

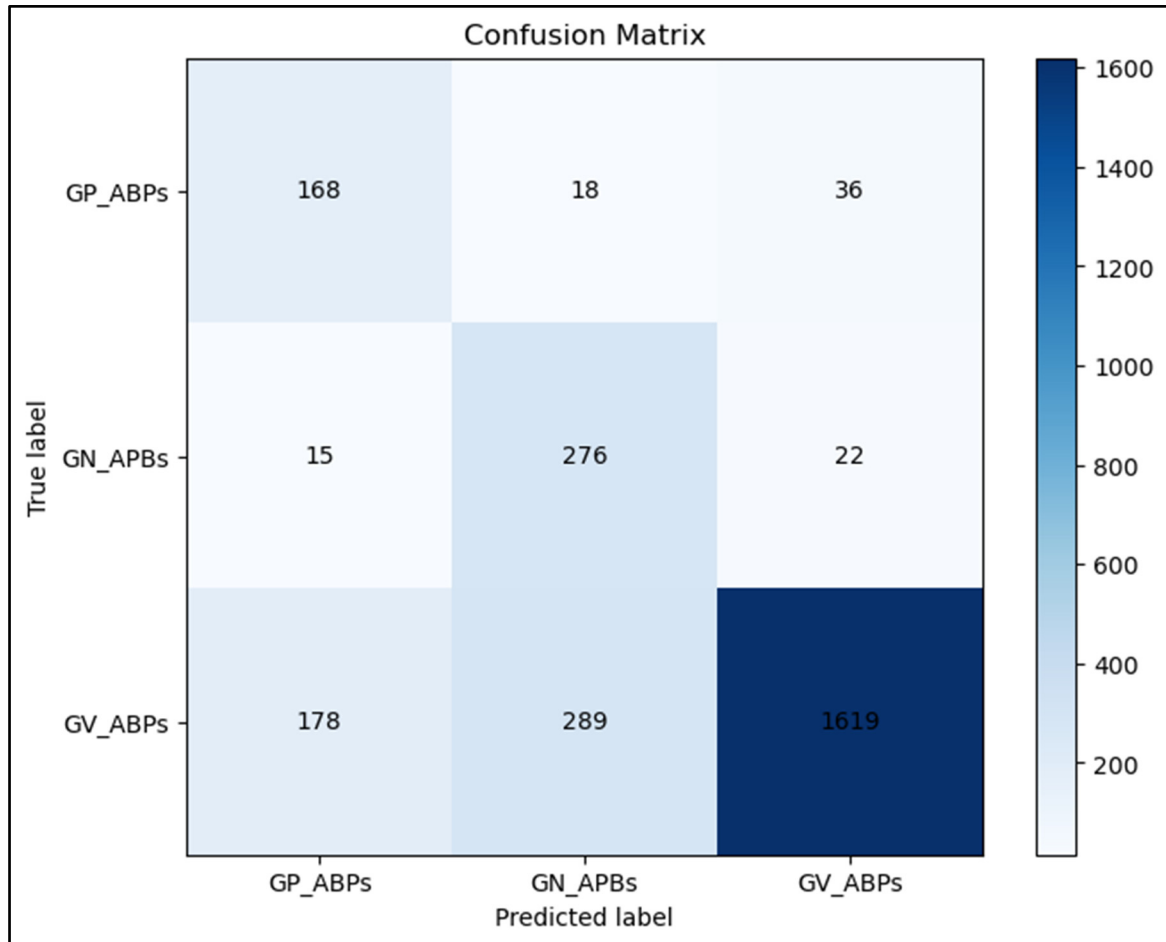

Supplement: s1 [file s1]
