# Supplementary material for: AntiBP3: A Method for Predicting Antibacterial Peptides against Gram-Positive/Negative/Variable Bacteria
Source: MDPI journal article supplement (doi:10.3390/antibiotics13020168), 2024-02-08
Supplement: s1 [file s1]

**Table S13: Performance of hybrid model (MOTIF+ML) on the validation set of gram-variable ABPs independent set at different frequencies**

| Frequency of a motif | Correct hits (MOTIF+ML) | Sn          | Sp          | Acc         | AUC         | AUPRC       | MCC         |
|----------------------|-------------------------|-------------|-------------|-------------|-------------|-------------|-------------|
| fp10_motif           | 86.03%                  | 86.7        | 85.4        | 86.0        | 0.93        | 0.92        | 0.72        |
| fp20_motif           | 87.01%                  | 85.8        | 88.3        | 87.0        | 0.94        | 0.94        | 0.74        |
| fp30_motif           | 87.28%                  | 85.5        | 89.1        | 87.3        | 0.94        | 0.93        | 0.75        |
| Only ML              | <b>87.01%</b>           | <b>83.9</b> | <b>90.1</b> | <b>87.0</b> | <b>0.94</b> | <b>0.93</b> | <b>0.74</b> |

# **Sn**: Sensitivity, **Sp**: Specificity, **Acc**: Accuracy, **MCC**: Matthews Correlation Coefficient, **AUC**: Area Under the Receiver Operating Characteristic curve, **AUPRC**: Area Under the Precision-Recall Curve
