# Supplementary material for: AntiBP3: A Method for Predicting Antibacterial Peptides against Gram-Positive/Negative/Variable Bacteria
Source: MDPI journal article supplement (doi:10.3390/antibiotics13020168), 2024-02-08
Supplement: s1 [file s1]

**Table S6: Performance of ML-models on training and validation dataset developed using four types of Binary profile-based features of N, C, NC-terminal of gram-variable ABPs**

| Feature type     | Terminal  | Training set |      |      |      |       |       | Validation set |      |      |             |       |      |
|------------------|-----------|--------------|------|------|------|-------|-------|----------------|------|------|-------------|-------|------|
|                  |           | Sn           | Sp   | Acc  | AUC  | AUPRC | MCC   | Sn             | Sp   | Acc  | AUC         | AUPRC | MCC  |
| <b>AAB (SVC)</b> | <b>N</b>  | 85.2         | 85.2 | 85.2 | 0.92 | 0.90  | 0.70  | 83.9           | 89.3 | 86.6 | 0.93        | 0.92  | 0.73 |
|                  | <b>C</b>  | 82.2         | 82.2 | 82.2 | 0.89 | 0.88  | 0.64  | 79.4           | 83.0 | 81.2 | 0.89        | 0.89  | 0.63 |
|                  | <b>NC</b> | 86.3         | 86.2 | 86.3 | 0.92 | 0.91  | 0.73  | 83.9           | 90.1 | 87.0 | <b>0.94</b> | 0.93  | 0.74 |
| <b>DPB (RF)</b>  | <b>N</b>  | 45.1         | 45.3 | 45.2 | 0.48 | 0.53  | -0.10 | 64.8           | 86.1 | 75.5 | 0.86        | 0.81  | 0.52 |
|                  | <b>C</b>  | 80.0         | 79.4 | 79.7 | 0.88 | 0.87  | 0.59  | 76.9           | 78.7 | 77.8 | 0.86        | 0.86  | 0.56 |
|                  | <b>NC</b> | 83.5         | 83.5 | 83.5 | 0.91 | 0.89  | 0.67  | 82.5           | 47.0 | 64.8 | 0.67        | 0.61  | 0.32 |
| <b>AIB (SVC)</b> | <b>N</b>  | 85.4         | 85.1 | 85.2 | 0.92 | 0.90  | 0.71  | 83.9           | 88.8 | 86.3 | 0.93        | 0.92  | 0.69 |
|                  | <b>C</b>  | 82.0         | 82.7 | 82.4 | 0.89 | 0.88  | 0.65  | 79.2           | 83.6 | 81.4 | 0.89        | 0.89  | 0.64 |
|                  | <b>NC</b> | 86.4         | 86.2 | 86.3 | 0.92 | 0.91  | 0.73  | 84.5           | 90.2 | 87.3 | 0.94        | 0.93  | 0.73 |
| <b>PCB (SVC)</b> | <b>N</b>  | 84.7         | 84.8 | 84.7 | 0.91 | 0.90  | 0.70  | 84.1           | 88.9 | 86.5 | 0.93        | 0.92  | 0.73 |
|                  | <b>C</b>  | 81.3         | 80.9 | 81.1 | 0.88 | 0.87  | 0.62  | 80.5           | 82.4 | 81.4 | 0.88        | 0.89  | 0.63 |
|                  | <b>NC</b> | 86.3         | 86.0 | 86.1 | 0.92 | 0.90  | 0.72  | 84.8           | 89.9 | 87.3 | 0.94        | 0.93  | 0.75 |

# **Sn**: Sensitivity, **Sp**: Specificity, **Acc**: Accuracy, **MCC**: Matthews Correlation Coefficient, **AUC**: Area Under the Receiver Operating Characteristic curve, **AUPRC**: Area Under the Precision-Recall Curve, **AAB**: Amino acid-based binary profile, **DPB**: Dipeptide-based binary profile, **PCB**: Physico-chemical properties based binary profile, **AIB**: Amino-acid indices based binary profile, **RF**: Random forest classifier, **SVC**: Support vector classifier
