# Supplementary material for: AntiBP3: A Method for Predicting Antibacterial Peptides against Gram-Positive/Negative/Variable Bacteria
Source: MDPI journal article supplement (doi:10.3390/antibiotics13020168), 2024-02-08
Supplement: s1 [file s1]

**Table S9: Performance of hybrid model (BLAST+ML) on the validation set of gram-negative ABPs independent at different e-value**

| <b>E-value</b>  | <b>Correct hits (BLAST+ML)</b> | <b>Sn</b> | <b>Sp</b> | <b>Acc</b> | <b>AUC</b> | <b>AUPRC</b> | <b>MCC</b> |
|-----------------|--------------------------------|-----------|-----------|------------|------------|--------------|------------|
| <b>1.00E-20</b> | 93.30%                         | 92.4      | 94.2      | 93.3       | 0.98       | 0.98         | 0.87       |
| <b>1.00E-10</b> | 93.99%                         | 94.2      | 93.8      | 94.0       | 0.98       | 0.97         | 0.88       |
| <b>1.00E-06</b> | 94.16%                         | 94.5      | 93.8      | 94.2       | 0.97       | 0.97         | 0.88       |
| <b>0.0001</b>   | 94.16%                         | 94.2      | 94.2      | 94.2       | 0.97       | 0.97         | 0.88       |
| <b>0.001</b>    | 94.33%                         | 94.5      | 94.2      | 94.3       | 0.97       | 0.97         | 0.89       |
| <b>0.01</b>     | 94.67%                         | 94.9      | 94.5      | 94.7       | 0.97       | 0.97         | 0.89       |
| <b>0.1</b>      | 94.85%                         | 94.9      | 94.9      | 94.9       | 0.97       | 0.97         | 0.90       |
| <b>1</b>        | 94.16%                         | 93.8      | 94.5      | 94.2       | 0.97       | 0.97         | 0.88       |
| <b>10</b>       | 91.41%                         | 92.1      | 90.7      | 91.4       | 0.96       | 0.96         | 0.83       |
| <b>50</b>       | 90.21%                         | 90.7      | 89.7      | 90.2       | 0.96       | 0.96         | 0.80       |
| <b>100</b>      | 90.03%                         | 90.4      | 89.7      | 90.0       | 0.96       | 0.96         | 0.80       |
| <b>200</b>      | 89.86%                         | 90.0      | 89.7      | 89.9       | 0.96       | 0.96         | 0.80       |
| <b>1000</b>     | 89.18%                         | 88.7      | 89.7      | 89.2       | 0.96       | 0.96         | 0.78       |
| <b>Only ML</b>  | 93.64%                         | 92.4      | 94.2      | 93.3       | 0.98       | 0.98         | 0.87       |

# **Sn**: Sensitivity, **Sp**: Specificity, **Acc**: Accuracy, **MCC**: Matthews Correlation Coefficient, **AUC**: Area Under the Receiver Operating Characteristic curve, **AUPRC**: Area Under the Precision-Recall Curve
