# Supplementary material for: AntiBP3: A Method for Predicting Antibacterial Peptides against Gram-Positive/Negative/Variable Bacteria
Source: MDPI journal article supplement (doi:10.3390/antibiotics13020168), 2024-02-08
Supplement: s1 [file s1]

**Table S11: Performance of hybrid model (MOTIF+ML) on the validation set of gram-positive ABPs independent set at different frequencies**

| <b>Frequency of a motif</b> | <b>Correct hits (MOTIF+ML)</b> | <b>Sn</b>   | <b>Sp</b>   | <b>Acc</b>  | <b>AUC</b>  | <b>AUPRC</b> | <b>MCC</b>  |
|-----------------------------|--------------------------------|-------------|-------------|-------------|-------------|--------------|-------------|
| <b>fp10_motif</b>           | 84.68%                         | 83.3        | 86.0        | 84.7        | 0.91        | 0.88         | 0.69        |
| <b>fp20_motif</b>           | 85.22%                         | 81.7        | 88.7        | 85.2        | 0.92        | 0.90         | 0.71        |
| <b>fp30_motif</b>           | 85.22%                         | 81.2        | 89.3        | 85.2        | 0.92        | 0.90         | 0.71        |
| <b>Only ML</b>              | <b>85.48%</b>                  | <b>80.7</b> | <b>90.3</b> | <b>85.5</b> | <b>0.93</b> | <b>0.92</b>  | <b>0.71</b> |

# **Sn**: Sensitivity, **Sp**: Specificity, **Acc**: Accuracy, **MCC**: Matthews Correlation Coefficient, **AUC**: Area Under the Receiver Operating Characteristic curve, **AUPRC**: Area Under the Precision-Recall Curve
