# Supplementary material for: AntiBP3: A Method for Predicting Antibacterial Peptides against Gram-Positive/Negative/Variable Bacteria
Source: MDPI journal article supplement (doi:10.3390/antibiotics13020168), 2024-02-08
Supplement: s1 [file s1]

**Table S3: Performance of Extra-tree classifier on training and validation dataset developed using 17 types of composition-based features for gram-variable ABPs**

| Feature Type | Training set |      |      |      |       |      | Validation set |      |      |      |       |      |
|--------------|--------------|------|------|------|-------|------|----------------|------|------|------|-------|------|
|              | Sn           | Sp   | Acc  | AUC  | AUPRC | MCC  | Sn             | Sp   | Acc  | AUC  | AUPRC | MCC  |
| <b>AAC</b>   | 85.1         | 85.6 | 85.3 | 0.93 | 0.91  | 0.71 | 84.7           | 89.7 | 87.2 | 0.95 | 0.95  | 0.74 |
| <b>DPC</b>   | 85.2         | 84.9 | 85.1 | 0.92 | 0.90  | 0.70 | 83.0           | 87.3 | 85.1 | 0.92 | 0.90  | 0.70 |
| <b>ATC</b>   | 79.0         | 79.0 | 79.0 | 0.86 | 0.85  | 0.58 | 80.7           | 81.4 | 81.1 | 0.89 | 0.89  | 0.62 |
| <b>BTC</b>   | 68.4         | 69.1 | 68.8 | 0.76 | 0.74  | 0.38 | 66.7           | 70.6 | 68.6 | 0.76 | 0.73  | 0.37 |
| <b>CTC</b>   | 83.9         | 83.8 | 83.9 | 0.90 | 0.89  | 0.68 | 83.2           | 87.3 | 85.3 | 0.91 | 0.90  | 0.71 |
| <b>PCP</b>   | 83.6         | 83.5 | 83.5 | 0.91 | 0.90  | 0.67 | 84.3           | 87.4 | 85.8 | 0.93 | 0.91  | 0.72 |
| <b>AAI</b>   | 84.1         | 83.7 | 83.9 | 0.91 | 0.89  | 0.68 | 85.1           | 87.3 | 86.2 | 0.92 | 0.90  | 0.73 |
| <b>RRI</b>   | 84.0         | 84.2 | 84.1 | 0.91 | 0.90  | 0.68 | 82.6           | 86.5 | 84.6 | 0.92 | 0.90  | 0.69 |
| <b>PRI</b>   | 83.1         | 83.2 | 83.2 | 0.90 | 0.89  | 0.66 | 81.9           | 85.4 | 83.6 | 0.91 | 0.89  | 0.67 |
| <b>DDR</b>   | 84.3         | 84.4 | 84.3 | 0.91 | 0.90  | 0.69 | 84.1           | 87.9 | 86.0 | 0.92 | 0.90  | 0.72 |
| <b>SEP</b>   | 67.6         | 67.1 | 67.4 | 0.74 | 0.73  | 0.35 | 72.5           | 72.7 | 72.6 | 0.79 | 0.78  | 0.45 |
| <b>SER</b>   | 85.2         | 85.4 | 85.3 | 0.92 | 0.91  | 0.71 | 84.1           | 88.2 | 86.2 | 0.93 | 0.91  | 0.72 |
| <b>SPC</b>   | 83.5         | 83.0 | 83.3 | 0.90 | 0.89  | 0.67 | 83.5           | 87.3 | 85.4 | 0.92 | 0.91  | 0.71 |
| <b>PAAC</b>  | 85.4         | 85.1 | 85.2 | 0.92 | 0.91  | 0.71 | 85.3           | 88.3 | 86.8 | 0.93 | 0.91  | 0.74 |
| <b>APAAC</b> | 85.6         | 85.4 | 85.5 | 0.92 | 0.91  | 0.71 | 85.4           | 89.7 | 87.5 | 0.95 | 0.95  | 0.75 |

|            |      |      |      |      |      |      |      |      |      |      |      |      |
|------------|------|------|------|------|------|------|------|------|------|------|------|------|
| <b>QSO</b> | 85.3 | 85.5 | 85.4 | 0.92 | 0.90 | 0.71 | 84.3 | 88.4 | 86.3 | 0.93 | 0.91 | 0.73 |
| <b>SOC</b> | 57.4 | 57.2 | 57.3 | 0.61 | 0.62 | 0.15 | 59.9 | 59.7 | 59.8 | 0.64 | 0.65 | 0.20 |

# **Sn**: Sensitivity, **Sp**: Specificity, **Acc**: Accuracy, **MCC**: Matthews Correlation Coefficient, **AUC**: Area Under the Receiver Operating Characteristic curve, **AUPRC**:Area Under the Precision-Recall Curve, **AAC**: Amino acid composition, **APAAC**: Amphiphilic pseudo amino acid composition, **DDR**: Distance distribution of residue, **DPC**: Di-peptide composition, **QSO**: Quasi-sequence order, **PCP**: Physico-chemical properties composition, **PAAC**: Pseudo amino acid composition, **RRI**: Residue repeat Information, **SPC**: Shannon entropy of physicochemical properties, **ATC**: Atomic composition , **BTC**: Bond type composition, **CTC**: Conjoint triad descriptors, **AAI**: Amino Acid index, **PRI**: Property repeats index, **SEP**: Shannon entropy of a protein, **SER**: Shannon entropy of a residue, **SOC**: Sequence order coupling number
