# Supplementary material for: AntiBP3: A Method for Predicting Antibacterial Peptides against Gram-Positive/Negative/Variable Bacteria
Source: MDPI journal article supplement (doi:10.3390/antibiotics13020168), 2024-02-08
Supplement: s1 [file s1]

**Table S2: Performance of Extra-tree classifier on training and validation dataset developed using 17 types of composition-based features for gram-negative ABPs**

| Feature Type | Training set |      |      |      |       |      | Validation set |      |      |      |       |      |
|--------------|--------------|------|------|------|-------|------|----------------|------|------|------|-------|------|
|              | Sn           | Sp   | Acc  | AUC  | AUPRC | MCC  | Sn             | Sp   | Acc  | AUC  | AUPRC | MCC  |
| <b>AAC</b>   | 90.0         | 89.6 | 89.8 | 0.96 | 0.96  | 0.80 | 93.1           | 93.1 | 93.1 | 0.98 | 0.98  | 0.86 |
| <b>DPC</b>   | 88.2         | 88.3 | 88.3 | 0.95 | 0.96  | 0.77 | 94.5           | 91.4 | 93.0 | 0.98 | 0.98  | 0.86 |
| <b>ATC</b>   | 84.1         | 84.5 | 84.3 | 0.91 | 0.92  | 0.69 | 88.7           | 89.7 | 89.2 | 0.95 | 0.96  | 0.78 |
| <b>BTC</b>   | 71.4         | 71.1 | 71.3 | 0.79 | 0.79  | 0.43 | 76.6           | 74.6 | 75.6 | 0.84 | 0.86  | 0.51 |
| <b>CTC</b>   | 87.5         | 88.0 | 87.7 | 0.94 | 0.94  | 0.75 | 92.1           | 90.0 | 91.1 | 0.97 | 0.98  | 0.82 |
| <b>PCP</b>   | 88.3         | 87.9 | 88.1 | 0.95 | 0.95  | 0.76 | 91.1           | 92.8 | 91.9 | 0.97 | 0.98  | 0.84 |
| <b>AAI</b>   | 88.5         | 88.0 | 88.2 | 0.95 | 0.95  | 0.77 | 92.4           | 93.1 | 92.8 | 0.97 | 0.98  | 0.86 |
| <b>RRI</b>   | 87.5         | 87.2 | 87.4 | 0.94 | 0.95  | 0.75 | 89.0           | 93.1 | 91.1 | 0.97 | 0.97  | 0.82 |
| <b>PRI</b>   | 86.3         | 85.8 | 86.1 | 0.94 | 0.94  | 0.72 | 90.0           | 89.7 | 89.9 | 0.97 | 0.97  | 0.80 |
| <b>DDR</b>   | 86.7         | 86.7 | 86.7 | 0.94 | 0.95  | 0.73 | 88.3           | 91.4 | 89.9 | 0.97 | 0.97  | 0.80 |
| <b>SEP</b>   | 70.0         | 66.7 | 68.3 | 0.72 | 0.68  | 0.37 | 69.8           | 75.6 | 73.7 | 0.80 | 0.63  | 0.44 |
| <b>SER</b>   | 89.2         | 88.9 | 89.1 | 0.96 | 0.96  | 0.78 | 91.1           | 94.9 | 93.0 | 0.97 | 0.98  | 0.86 |
| <b>SPC</b>   | 87.6         | 87.9 | 87.8 | 0.94 | 0.94  | 0.76 | 90.7           | 90.0 | 90.4 | 0.96 | 0.97  | 0.81 |
| <b>PAAC</b>  | 90.1         | 89.8 | 90.0 | 0.96 | 0.96  | 0.80 | 92.8           | 94.2 | 93.5 | 0.97 | 0.98  | 0.87 |
| <b>APAAC</b> | 89.4         | 89.6 | 89.5 | 0.96 | 0.96  | 0.79 | 92.1           | 94.5 | 93.3 | 0.98 | 0.98  | 0.87 |

|            |      |      |      |      |      |      |      |      |      |      |      |      |
|------------|------|------|------|------|------|------|------|------|------|------|------|------|
| <b>QSO</b> | 89.2 | 89.4 | 89.3 | 0.96 | 0.96 | 0.79 | 90.7 | 93.5 | 92.1 | 0.97 | 0.98 | 0.84 |
| <b>SOC</b> | 69.4 | 69.3 | 69.4 | 0.76 | 0.76 | 0.39 | 72.2 | 70.5 | 71.3 | 0.79 | 0.80 | 0.43 |

# **Sn**: Sensitivity, **Sp**: Specificity, **Acc**: Accuracy, **MCC**: Matthews Correlation Coefficient, **AUC**: Area Under the Receiver Operating Characteristic curve, **AUPRC**:Area Under the Precision-Recall Curve, **AAC**: Amino acid composition, **APAAC**: Amphiphilic pseudo amino acid composition, **DDR**: Distance distribution of residue, **DPC**: Di-peptide composition, **QSO**: Quasi-sequence order, **PCP**: Physico-chemical properties composition, **PAAC**: Pseudo amino acid composition, **RRI**: Residue repeat Information, **SPC**: Shannon entropy of physicochemical properties, **ATC**: Atomic composition , **BTC**: Bond type composition, **CTC**: Conjoint triad descriptors, **AAI**: Amino Acid index, **PRI**: Property repeats index, **SEP**: Shannon entropy of a protein, **SER**: Shannon entropy of a residue, **SOC**: Sequence order coupling number
