# Supplementary material for: AntiBP3: A Method for Predicting Antibacterial Peptides against Gram-Positive/Negative/Variable Bacteria
Source: MDPI journal article supplement (doi:10.3390/antibiotics13020168), 2024-02-08
Supplement: s1 [file s1]

**Table S7: Performance of ML-models on training and validation dataset developed using FastText based features for GP, GN and GV ABPs**

| Category of ABPs | Feature (n-gram size)  | Training set |      |      |      |       |      | Validation set |      |      |      |       |      |
|------------------|------------------------|--------------|------|------|------|-------|------|----------------|------|------|------|-------|------|
|                  |                        | Sn           | Sp   | Acc  | AUC  | AUPRC | MCC  | Sn             | Sp   | Acc  | AUC  | AUPRC | MCC  |
| Gram-positive    | 1g(ET)                 | 83.2         | 83.9 | 83.5 | 0.91 | 0.91  | 0.67 | 80.7           | 87.6 | 84.1 | 0.92 | 0.91  | 0.68 |
|                  | 2g(ET)                 | 82.4         | 83.1 | 82.7 | 0.91 | 0.92  | 0.66 | 81.2           | 89.8 | 85.5 | 0.91 | 0.91  | 0.71 |
|                  | 3g(LR)                 | 78.8         | 78.0 | 78.4 | 0.87 | 0.88  | 0.57 | 72.6           | 83.3 | 78.0 | 0.84 | 0.85  | 0.56 |
|                  | 2g & 3g combined (ET)  | 83.1         | 82.7 | 82.9 | 0.91 | 0.92  | 0.66 | 79.6           | 85.5 | 82.5 | 0.90 | 0.90  | 0.65 |
| Gram-negative    | 1g(ET)                 | 88.5         | 88.8 | 88.6 | 0.95 | 0.96  | 0.77 | 92.4           | 91.1 | 91.8 | 0.97 | 0.98  | 0.84 |
|                  | 2g(ET)                 | 87.3         | 87.8 | 87.5 | 0.94 | 0.95  | 0.75 | 92.1           | 90.0 | 91.1 | 0.97 | 0.98  | 0.82 |
|                  | 3g(LR)                 | 84.6         | 85.1 | 84.9 | 0.92 | 0.93  | 0.70 | 91.4           | 90.0 | 90.7 | 0.96 | 0.96  | 0.82 |
|                  | 2g & 3g combined (ET)  | 88.4         | 88.7 | 88.5 | 0.95 | 0.96  | 0.77 | 91.8           | 89.7 | 90.7 | 0.97 | 0.98  | 0.82 |
| Gram-variable    | 1g(SVC)                | 81.8         | 82.2 | 82.0 | 0.89 | 0.86  | 0.64 | 84.5           | 86.6 | 85.5 | 0.92 | 0.92  | 0.71 |
|                  | 2g(SVC)                | 85.7         | 85.4 | 85.5 | 0.92 | 0.90  | 0.71 | 84.5           | 89.3 | 86.9 | 0.93 | 0.93  | 0.74 |
|                  | 3g(LR)                 | 84.0         | 83.9 | 84.0 | 0.91 | 0.89  | 0.68 | 81.9           | 86.1 | 84.0 | 0.92 | 0.91  | 0.68 |
|                  | 2g & 3g combined (SVC) | 86.6         | 86.2 | 86.4 | 0.92 | 0.91  | 0.73 | 83.9           | 89.2 | 86.6 | 0.93 | 0.92  | 0.73 |

# **Sn**: Sensitivity, **Sp**: Specificity, **Acc**: Accuracy, **MCC**: Matthews Correlation Coefficient, **AUC**: Area Under the Receiver Operating Characteristic curve, **AUPRC**: Area Under the Precision-Recall Curve
