# Supplementary material for: AntiBP3: A Method for Predicting Antibacterial Peptides against Gram-Positive/Negative/Variable Bacteria
Source: MDPI journal article supplement (doi:10.3390/antibiotics13020168), 2024-02-08
Supplement: s1 [file s1]

**Table S1: Performance of Extra tree classifier on training and validation dataset developed using 17 types of composition-based features for gram-positive ABPs**

| Feature Type | Training set |      |      |      |       |      | Validation set |      |      |      |       |      |
|--------------|--------------|------|------|------|-------|------|----------------|------|------|------|-------|------|
|              | Sn           | Sp   | Acc  | AUC  | AUPRC | MCC  | Sn             | Sp   | Acc  | AUC  | AUPRC | MCC  |
| <b>AAC</b>   | 85.1         | 85.8 | 85.4 | 0.93 | 0.93  | 0.71 | 83.9           | 90.9 | 87.4 | 0.94 | 0.94  | 0.75 |
| <b>DPC</b>   | 83.9         | 84.0 | 83.9 | 0.91 | 0.92  | 0.68 | 83.3           | 88.7 | 86.0 | 0.93 | 0.92  | 0.72 |
| <b>ATC</b>   | 75.9         | 75.5 | 75.7 | 0.84 | 0.84  | 0.52 | 67.7           | 82.3 | 75.0 | 0.84 | 0.83  | 0.51 |
| <b>BTC</b>   | 67.9         | 67.7 | 67.8 | 0.75 | 0.74  | 0.36 | 65.1           | 63.4 | 64.3 | 0.70 | 0.70  | 0.29 |
| <b>CTC</b>   | 80.0         | 79.0 | 79.5 | 0.88 | 0.88  | 0.59 | 81.7           | 86.6 | 84.1 | 0.90 | 0.90  | 0.68 |
| <b>PCP</b>   | 81.7         | 82.0 | 81.9 | 0.91 | 0.91  | 0.64 | 82.8           | 89.3 | 86.0 | 0.94 | 0.93  | 0.72 |
| <b>AAI</b>   | 83.5         | 83.7 | 83.6 | 0.91 | 0.91  | 0.67 | 81.2           | 89.3 | 85.2 | 0.92 | 0.92  | 0.71 |
| <b>RRI</b>   | 80.9         | 79.8 | 80.4 | 0.89 | 0.90  | 0.61 | 80.1           | 85.5 | 82.8 | 0.91 | 0.91  | 0.66 |
| <b>PRI</b>   | 78.8         | 78.9 | 78.8 | 0.87 | 0.88  | 0.58 | 0.6            | 76.3 | 81.5 | 0.88 | 0.87  | 0.63 |
| <b>DDR</b>   | 82.4         | 82.1 | 82.3 | 0.91 | 0.91  | 0.65 | 79.6           | 87.6 | 83.6 | 0.93 | 0.91  | 0.67 |
| <b>SEP</b>   | 62.0         | 55.8 | 58.9 | 0.61 | 0.58  | 0.18 | 52.2           | 64.0 | 58.1 | 0.60 | 0.59  | 0.16 |
| <b>SER</b>   | 83.9         | 83.3 | 83.6 | 0.92 | 0.92  | 0.67 | 78.5           | 90.3 | 84.4 | 0.92 | 0.92  | 0.69 |
| <b>SPC</b>   | 82.3         | 81.5 | 81.9 | 0.90 | 0.90  | 0.64 | 81.2           | 89.3 | 85.2 | 0.92 | 0.91  | 0.71 |
| <b>PAAC</b>  | 84.5         | 85.2 | 84.9 | 0.93 | 0.93  | 0.70 | 81.7           | 90.3 | 86.0 | 0.93 | 0.93  | 0.72 |
| <b>APAAC</b> | 85.5         | 84.7 | 85.1 | 0.93 | 0.93  | 0.70 | 83.9           | 88.2 | 86.0 | 0.93 | 0.92  | 0.72 |

|            |      |      |      |      |      |      |      |      |      |      |      |      |
|------------|------|------|------|------|------|------|------|------|------|------|------|------|
| <b>QSO</b> | 84.7 | 85.1 | 84.9 | 0.92 | 0.92 | 0.70 | 82.8 | 90.3 | 86.6 | 0.93 | 0.92 | 0.73 |
| <b>SOC</b> | 60.0 | 60.0 | 60.0 | 0.66 | 0.67 | 0.20 | 58.6 | 67.7 | 63.2 | 0.64 | 0.63 | 0.27 |

# **Sn**: Sensitivity, **Sp**: Specificity, **Acc**: Accuracy, **MCC**: Matthews Correlation Coefficient, **AUC**: Area Under the Receiver Operating Characteristic curve, **AUPRC**:Area Under the Precision-Recall Curve, **AAC**: Amino acid composition, **APAAC**: Amphiphilic pseudo amino acid composition, **DDR**: Distance distribution of residue, **DPC**: Di-peptide composition, **QSO**: Quasi-sequence order, **PCP**: Physico-chemical properties composition, **PAAC**: Pseudo amino acid composition, **RRI**: Residue repeat Information, **SPC**: Shannon entropy of physicochemical properties, **ATC**: Atomic composition , **BTC**: Bond type composition, **CTC**: Conjoint triad descriptors, **AAI**: Amino Acid index, **PRI**: Property repeats index, **SEP**: Shannon entropy of a protein, **SER**: Shannon entropy of a residue, **SOC**: Sequence order coupling number
