# Supplementary material for: AntiBP3: A Method for Predicting Antibacterial Peptides against Gram-Positive/Negative/Variable Bacteria
Source: MDPI journal article supplement (doi:10.3390/antibiotics13020168), 2024-02-08
Supplement: s1 [file s1]

**Figure S1: AUC-ROC comparison of different ML models on compositional-based AAC features for GP, GN and GV ABPs.**

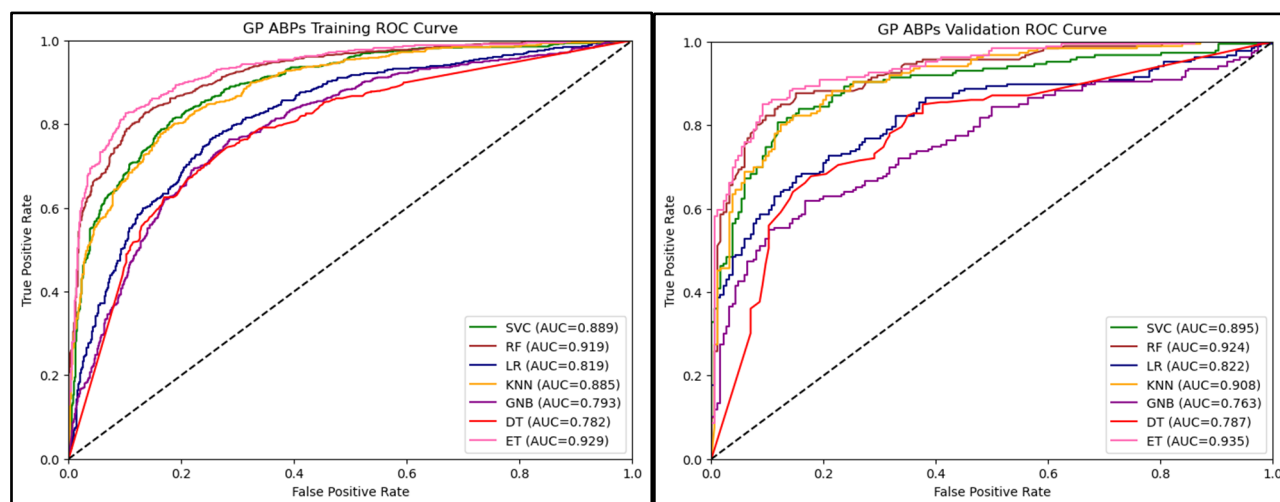

**Figure S1.1: The performance of ML models on training and testing data of GP ABPs on AAC feature**

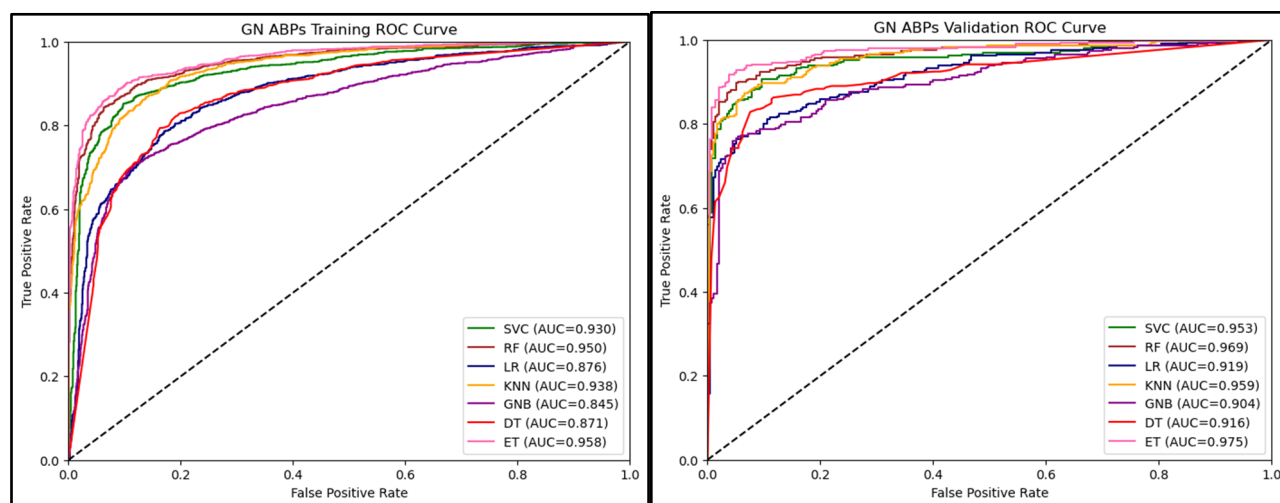

**Figure S1.2: The performance of ML models on training and testing data of GN ABPs on AAC feature**

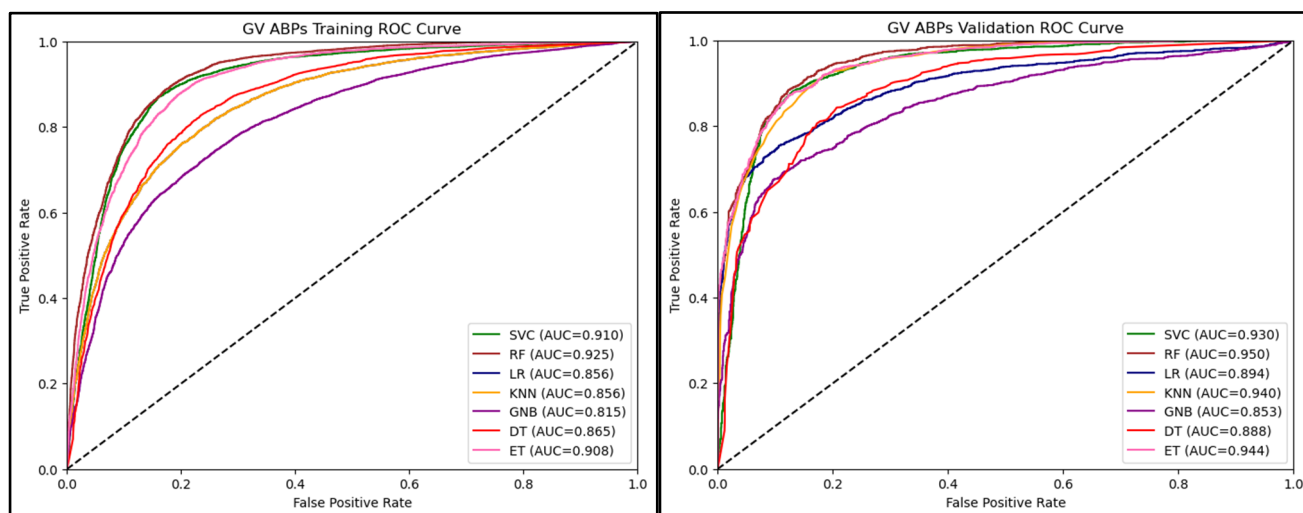

**Figure S1.3: The performance of ML models on training and testing data of GV ABPs on AAC feature**
