# Supplementary material for: AntiBP3: A Method for Predicting Antibacterial Peptides against Gram-Positive/Negative/Variable Bacteria
Source: MDPI journal article supplement (doi:10.3390/antibiotics13020168), 2024-02-08
Supplement: s1 [file s1]

**Table S8: Performance of hybrid model (BLAST+ML) on the validation set of gram-positive ABPs independent at different e-value**

| <b>E-value</b>  | <b>Correct hits (BLAST+ML)</b> | <b>Sn</b>   | <b>Sp</b>   | <b>Acc</b>  | <b>AUC</b>  | <b>AUPRC</b> | <b>MCC</b>  |
|-----------------|--------------------------------|-------------|-------------|-------------|-------------|--------------|-------------|
| <b>1.00E-20</b> | <b>86.02%</b>                  | <b>81.7</b> | <b>90.3</b> | <b>86.0</b> | <b>0.94</b> | <b>0.93</b>  | <b>0.72</b> |
| <b>1.00E-10</b> | 85.75%                         | 81.2        | 90.3        | 85.8        | 0.93        | 0.92         | 0.72        |
| <b>1.00E-06</b> | 86.29%                         | 82.3        | 90.3        | 86.3        | 0.93        | 0.91         | 0.73        |
| <b>0.0001</b>   | 86.83%                         | 83.3        | 90.3        | 86.8        | 0.93        | 0.91         | 0.74        |
| <b>0.001</b>    | 87.90%                         | 85.5        | 90.3        | 87.9        | 0.93        | 0.91         | 0.76        |
| <b>0.01</b>     | 88.44%                         | 86.0        | 90.9        | 88.4        | 0.93        | 0.92         | 0.77        |
| <b>0.1</b>      | 87.90%                         | 86.6        | 89.3        | 87.9        | 0.93        | 0.92         | 0.76        |
| <b>1</b>        | 86.56%                         | 87.1        | 86.0        | 86.6        | 0.93        | 0.92         | 0.73        |
| <b>10</b>       | 81.18%                         | 83.9        | 78.5        | 81.2        | 0.90        | 0.89         | 0.62        |
| <b>50</b>       | 80.11%                         | 83.3        | 76.9        | 80.1        | 0.90        | 0.89         | 0.60        |
| <b>100</b>      | 80.38%                         | 83.3        | 77.4        | 80.4        | 0.90        | 0.89         | 0.61        |
| <b>200</b>      | 80.11%                         | 83.3        | 76.9        | 80.1        | 0.90        | 0.89         | 0.60        |
| <b>1000</b>     | 80.38%                         | 83.9        | 76.9        | 80.4        | 0.91        | 0.89         | 0.61        |
| <b>Only ML</b>  | 85.48%                         | 80.7        | 90.3        | 85.5        | 0.93        | 0.92         | 0.71        |

# **Sn**: Sensitivity, **Sp**: Specificity, **Acc**: Accuracy, **MCC**: Matthews Correlation Coefficient, **AUC**: Area Under the Receiver Operating Characteristic curve, **AUPRC**: Area Under the Precision-Recall Curve
