# Supplementary material for: AntiBP3: A Method for Predicting Antibacterial Peptides against Gram-Positive/Negative/Variable Bacteria
Source: MDPI journal article supplement (doi:10.3390/antibiotics13020168), 2024-02-08
Supplement: s1 [file s1]

**Table S15: Performance of DL-models on validation dataset developed using four types of Binary profile-based features of N, C, NC-terminal of gram-positive ABPs**

| Feature type | Terminal | ANN         |       |      | CNN         |       |      | RNN         |       |      | LSTM        |       |      |
|--------------|----------|-------------|-------|------|-------------|-------|------|-------------|-------|------|-------------|-------|------|
|              |          | AUC         | AUPRC | MCC  |
| AAB          | N        | 0.88        | 0.88  | 0.60 | 0.88        | 0.88  | 0.58 | 0.87        | 0.88  | 0.63 | 0.85        | 0.86  | 0.55 |
|              | C        | 0.83        | 0.84  | 0.48 | 0.81        | 0.81  | 0.46 | 0.83        | 0.83  | 0.50 | 0.80        | 0.79  | 0.47 |
|              | NC       | 0.89        | 0.89  | 0.62 | 0.89        | 0.90  | 0.61 | 0.88        | 0.89  | 0.64 | 0.85        | 0.86  | 0.55 |
| DPB          | N        | 0.87        | 0.89  | 0.55 | 0.89        | 0.89  | 0.64 | 0.87        | 0.88  | 0.62 | 0.88        | 0.87  | 0.60 |
|              | C        | 0.84        | 0.84  | 0.51 | 0.84        | 0.84  | 0.51 | 0.83        | 0.82  | 0.49 | 0.83        | 0.84  | 0.47 |
|              | NC       | <b>0.90</b> | 0.90  | 0.64 | 0.88        | 0.89  | 0.62 | <b>0.90</b> | 0.89  | 0.65 | 0.87        | 0.88  | 0.59 |
| AIB          | N        | 0.88        | 0.86  | 0.61 | 0.88        | 0.87  | 0.63 | 0.88        | 0.88  | 0.61 | 0.88        | 0.89  | 0.61 |
|              | C        | 0.82        | 0.81  | 0.49 | 0.82        | 0.80  | 0.48 | 0.84        | 0.83  | 0.55 | 0.80        | 0.80  | 0.46 |
|              | NC       | 0.90        | 0.88  | 0.68 | 0.89        | 0.88  | 0.66 | <b>0.90</b> | 0.89  | 0.64 | <b>0.89</b> | 0.89  | 0.62 |
| PCB          | N        | 0.89        | 0.90  | 0.65 | <b>0.90</b> | 0.89  | 0.65 | 0.89        | 0.90  | 0.65 | 0.87        | 0.87  | 0.60 |
|              | C        | 0.84        | 0.83  | 0.54 | 0.81        | 0.80  | 0.47 | 0.81        | 0.79  | 0.44 | 0.81        | 0.80  | 0.48 |
|              | NC       | 0.90        | 0.89  | 0.67 | 0.88        | 0.86  | 0.64 | 0.89        | 0.89  | 0.64 | 0.87        | 0.87  | 0.57 |

# **MCC**: Matthews Correlation Coefficient, **AUC**: Area Under the Receiver Operating Characteristic curve, **AUPRC**: Area Under the Precision-Recall Curve, **AAB**: Amino acid-based binary profile, **DPB**: Dipeptide-based binary profile, **PCB**: Physico-chemical properties based binary profile, **AIB**: Amino-acid indices based binary profile, **ANN**: Artificial neural network, **CNN**: Convolution neural network, **RNN**: Recurrent neural network, **LSTM**: Long short-term memory
