# Supplementary material for: AntiBP3: A Method for Predicting Antibacterial Peptides against Gram-Positive/Negative/Variable Bacteria
Source: MDPI journal article supplement (doi:10.3390/antibiotics13020168), 2024-02-08
Supplement: s1 [file s1]

**Table S16: Performance of DL-models on validation dataset developed using FastText based features for GP ABPs**

| Feature<br>(n-gram size)    | ANN         |       |      | CNN         |       |      | RNN         |       |      | LSTM        |       |      |
|-----------------------------|-------------|-------|------|-------------|-------|------|-------------|-------|------|-------------|-------|------|
|                             | AUC         | AUPRC | MCC  |
| <b>1g</b>                   | 0.85        | 0.81  | 0.56 | 0.85        | 0.85  | 0.52 | <b>0.87</b> | 0.87  | 0.56 | 0.79        | 0.79  | 0.42 |
| <b>2g</b>                   | <b>0.88</b> | 0.85  | 0.64 | 0.86        | 0.85  | 0.56 | 0.86        | 0.84  | 0.53 | <b>0.86</b> | 0.87  | 0.59 |
| <b>3g</b>                   | 0.86        | 0.87  | 0.56 | 0.82        | 0.84  | 0.50 | 0.84        | 0.86  | 0.56 | 0.83        | 0.84  | 0.52 |
| <b>2g &amp; 3g combined</b> | 0.87        | 0.88  | 0.59 | <b>0.88</b> | 0.86  | 0.63 | 0.85        | 0.86  | 0.54 | 0.83        | 0.82  | 0.55 |

# **AUC**: Area Under the Receiver Operating Characteristic curve, **AUPRC**: Area Under the Precision-Recall Curve, **MCC**: Matthews Correlation Coefficient, **ANN**: Artificial neural network, **CNN**: Convolution neural network, **RNN**: Recurrent neural network, **LSTM**: Long short-term memory
